# Supplementary material for: Integration of Biological Networks for Acidithiobacillus thiooxidans Describes a Modular Gene Regulatory Organization of Bioleaching Pathways
Source: Front Mol Biosci. 2020 Jan 10;6:155. doi: 10.3389/fmolb.2019.00155 (PMC6966769; doi:10.3389/fmolb.2019.00155)
Supplement: Supplementary file 1 [file Table_1.XLSX]

## Sheet: ST1
Supplementary table 1. Minimum size source transcription factors that regulate the entire metabolic operons on each sub-category.
Class	Metabolic Operons	Minimum source transcription factors
NAD Biosynthesis	3	{SMTB}
Heme Biosynthesis	5	{CYSB}
Spermidine Biosynthesis	7	{ CYSB, CUSR, SMTB }
		{ CYSB, CUSR, ARSR }
Sulfur assimilation	11	{ CYSB, SMTB, ISCR }
Energy generation	13	{ CYSB }
RISC oxidation	22	{CYSB, SMTB, CUSR, FIS}

## Sheet: ST2
Supplementary table 2. At. thiooxidans Licanantay metabolic network: Pathways and genes in the reconstruction.
Pathway Id	Pathway Name	Category	Genes
GLUTATHIONESYN-PWY	glutathione biosynthesis		ATLIC_568,ATLIC_569
HEME-BIOSYNTHESIS-II	heme b biosynthesis I (aerobic)		ATLIC_1555,ATLIC_1587
CYSTSYN-PWY	L-cysteine biosynthesis I		ATLIC_2603,ATLIC_722
SERSYN-PWY	L-serine biosynthesis		ATLIC_1376,ATLIC_1674,ATLIC_1593,ATLIC_1841
PYRIDNUCSYN-PWY	NAD biosynthesis I (from aspartate)		ATLIC_116,ATLIC_1274
NAD-BIOSYNTHESIS-III	NAD biosynthesis III		ATLIC_2502,ATLIC_2503
PWY0-1334	NADH to cytochrome bd oxidase electron transfer I		ATLIC_1025,ATLIC_1026
PWY0-1335	NADH to cytochrome bo oxidase electron transfer I		ATLIC_1975,ATLIC_1976
PWY-5340	sulfate activation for sulfonation		ATLIC_2621,ATLIC_2622,ATLIC_2155,ATLIC_2393,ATLIC_2531,ATLIC_3392,ATLIC_3494
SO4ASSIM-PWY	sulfate reduction I (assimilatory)		ATLIC_2619,ATLIC_2620,ATLIC_2393,ATLIC_2531,ATLIC_3392,ATLIC_3494
PWY-5918	superpathway of heme b biosynthesis from glutamate		ATLIC_1555,ATLIC_1587
SULFATE-CYS-PWY	superpathway of sulfate assimilation and cysteine biosynthesis		ATLIC_1376,ATLIC_1674,ATLIC_2021,ATLIC_2031,ATLIC_3691,ATLIC_3692,ATLIC_650,ATLIC_678,ATLIC_679
PWY-5188	tetrapyrrole biosynthesis I (from glutamate)		ATLIC_2271,ATLIC_255,ATLIC_2150,ATLIC_2582
HEMN-RXN	coproporphyrinogen dehydrogenase (EC 1.3.98.3)		ATLIC_180,ATLIC_1037,ATLIC_2582
ATPSYN-RXN	F0F1 ATP synthase (EC: 3.6.3.14)		ATLIC_2012,ATLIC_2013
PENTOSE-P-PWY	pentose phosphate pathway		ATLIC_1062,ATLIC_1067
NONOXIPENT-PWY	pentose phosphate pathway (non-oxidative branch)		ATLIC_1062,ATLIC_1067,ATLIC_2558,ATLIC_2559,ATLIC_2560
OXIDATIVEPENT-PWY	pentose phosphate pathway (oxidative branch) I		ATLIC_1918,ATLIC_1919
PWY-5155	beta-alanine biosynthesis III		ATLIC_2777,ATLIC_2538
PWY-1781	beta-alanine degradation II		ATLIC_2137
KDO-LIPASYN-PWY	(Kdo)2-lipid A biosynthesis I		ATLIC_245,ATLIC_2874
PWY-6164	3-dehydroquinate biosynthesis I		ATLIC_1216,ATLIC_1379,ATLIC_3536,ATLIC_654,ATLIC_655,ATLIC_804,ATLIC_805,ATLIC_928,ATLIC_979,ATLIC_980
PWY-5389	3-methylthiopropanoate biosynthesis		ATLIC_2560,ATLIC_2413,ATLIC_2415
PWY-6890	4-amino-2-methyl-5-diphosphomethylpyrimidine biosynthesis		ATLIC_257,ATLIC_291,ATLIC_1886,ATLIC_2012,ATLIC_2013,ATLIC_2014,ATLIC_2015,ATLIC_2016,ATLIC_2017,ATLIC_2018,ATLIC_2019,ATLIC_2395,ATLIC_343
PWY-6543	4-aminobenzoate biosynthesis		ATLIC_3468,ATLIC_89,ATLIC_3294
PWY-5755	4-hydroxybenzoate biosynthesis II (microbes)		ATLIC_2186,ATLIC_1137,ATLIC_1138,ATLIC_1140,ATLIC_1141,ATLIC_1142,ATLIC_1143,ATLIC_122,ATLIC_1536,ATLIC_2874
PWY-6121	5-aminoimidazole ribonucleotide biosynthesis I		ATLIC_1148,ATLIC_1149,ATLIC_1590,ATLIC_2139
PWY-6122	5-aminoimidazole ribonucleotide biosynthesis II		ATLIC_1148,ATLIC_2155,ATLIC_2400,ATLIC_2821,ATLIC_3125,ATLIC_650
PWY-2301	myo-inositol biosynthesis		ATLIC_1060,ATLIC_724
OANTIGEN-PWY	O-antigen building blocks biosynthesis (E. coli)		ATLIC_1916,ATLIC_2020,ATLIC_400,ATLIC_920
PWY-6151	S-adenosyl-L-methionine cycle I		ATLIC_1520,ATLIC_1960
PWY-5041	S-adenosyl-L-methionine cycle II		ATLIC_1519,ATLIC_1520,ATLIC_1063,ATLIC_1064,ATLIC_1066,ATLIC_1067,ATLIC_1517,ATLIC_1545,ATLIC_1816,ATLIC_1877,ATLIC_2785,ATLIC_2786,ATLIC_649,ATLIC_820,ATLIC_821
PWY-6756	S-methyl-5'-thioadenosine degradation II		ATLIC_1671,ATLIC_3500
PWY-6753	S-methyl-5'-thioadenosine degradation III		ATLIC_1404,ATLIC_1671,ATLIC_202,ATLIC_2720,ATLIC_3295,ATLIC_700,ATLIC_95
PWY-4361	S-methyl-5-thio-alpha-D-ribose 1-phosphate degradation		ATLIC_1374,ATLIC_2557,ATLIC_202,ATLIC_2720,ATLIC_3295,ATLIC_700,ATLIC_95
PWY0-1313	acetate conversion to acetyl-CoA		ATLIC_1347,ATLIC_1348,ATLIC_1552,ATLIC_1594,ATLIC_444
PWY0-1312	acetate formation from acetyl-CoA I		ATLIC_1892,ATLIC_2537,ATLIC_1379,ATLIC_1381,ATLIC_1552,ATLIC_1593,ATLIC_1594,ATLIC_1841,ATLIC_444
PWY-6619	adenine and adenosine salvage VI		ATLIC_1522
PWY-6610	adenine salvage		ATLIC_1670,ATLIC_2413,ATLIC_597,ATLIC_598
PWY-7227	adenosine deoxyribonucleotides de novo biosynthesis		ATLIC_2752,ATLIC_3316,ATLIC_2277
SALVADEHYPOX-PWY	adenosine nucleotides degradation II		ATLIC_1249,ATLIC_1697
PWY-7219	adenosine ribonucleotides de novo biosynthesis		ATLIC_150,ATLIC_1655
PWY0-1241	ADP-L-glycero-beta-D-manno-heptose biosynthesis		ATLIC_1044,ATLIC_1345
PWY-7805	aminomethylphosphonate degradation		ATLIC_1135,ATLIC_1136,ATLIC_678,ATLIC_679
AMMASSIM-PWY	ammonia assimilation cycle III		ATLIC_1247,ATLIC_1589
PWY0-1261	anhydromuropeptides recycling		ATLIC_1553,ATLIC_2020,ATLIC_2917,ATLIC_2918,ATLIC_2919,ATLIC_825
PWY0-1299	arginine dependent acid resistance		ATLIC_2481,ATLIC_3886
PWY0-1507	biotin biosynthesis from 8-amino-7-oxononanoate I		ATLIC_3532,ATLIC_386,ATLIC_3239
PWY-7639	bis(guanylyl molybdenum cofactor) biosynthesis		ATLIC_2167
CALVIN-PWY	Calvin-Benson-Bassham cycle		ATLIC_1061,ATLIC_1062
PWY-5668	cardiolipin biosynthesis I		ATLIC_2311,ATLIC_306
PWY-5667	CDP-diacylglycerol biosynthesis I		ATLIC_1030,ATLIC_1586,ATLIC_2047,ATLIC_2147,ATLIC_294
PWY0-1319	CDP-diacylglycerol biosynthesis II		ATLIC_1030,ATLIC_1586
PWY-6163	chorismate biosynthesis from 3-dehydroquinate		ATLIC_1351,ATLIC_1381,ATLIC_1972,ATLIC_2421
ARO-PWY	chorismate biosynthesis I		ATLIC_1216,ATLIC_1351
PWY-7205	CMP phosphorylation		ATLIC_1382,ATLIC_928
PWY-1269	CMP-3-deoxy-D-manno-octulosonate biosynthesis		ATLIC_1537,ATLIC_2317,ATLIC_3730
COA-PWY	coenzyme A biosynthesis I (prokaryotic)		ATLIC_1547,ATLIC_1664,ATLIC_1977,ATLIC_225,ATLIC_2787,ATLIC_2788,ATLIC_2789,ATLIC_3730
PWY0-541	cyclopropane fatty acid (CFA) biosynthesis		ATLIC_1234,ATLIC_1464
MANNCAT-PWY	D-mannose degradation		ATLIC_2047,ATLIC_136,ATLIC_1377,ATLIC_138,ATLIC_2545,ATLIC_564
PWY-5785	di-trans,poly-cis-undecaprenyl phosphate biosynthesis		ATLIC_1300,ATLIC_701,ATLIC_2233,ATLIC_2608,ATLIC_2609
DTDPRHAMSYN-PWY	dTDP-L-rhamnose biosynthesis I		ATLIC_3691,ATLIC_3692,ATLIC_1064,ATLIC_1065,ATLIC_1066,ATLIC_1152,ATLIC_1153,ATLIC_1525,ATLIC_1545,ATLIC_1877,ATLIC_1888,ATLIC_1889,ATLIC_1891,ATLIC_1915,ATLIC_1916,ATLIC_2031,ATLIC_2316,ATLIC_3005,ATLIC_3188,ATLIC_649
PWY-5670	epoxysqualene biosynthesis		ATLIC_2723,ATLIC_1065,ATLIC_1066,ATLIC_1877,ATLIC_1888,ATLIC_1889,ATLIC_1891,ATLIC_1916,ATLIC_1920,ATLIC_2031,ATLIC_2316,ATLIC_2612,ATLIC_649
RIBOSYN2-PWY	flavin biosynthesis I (bacteria and plants)		ATLIC_2915,ATLIC_2916
PWY-2161	folate polyglutamylation		ATLIC_2157,ATLIC_2913,ATLIC_1137,ATLIC_1138,ATLIC_1140,ATLIC_1141,ATLIC_1142,ATLIC_1143,ATLIC_122,ATLIC_1536,ATLIC_2874
PWY-1801	formaldehyde oxidation II (glutathione-dependent)		ATLIC_3206,ATLIC_3207,ATLIC_3536,ATLIC_654,ATLIC_655,ATLIC_804,ATLIC_805,ATLIC_928,ATLIC_979,ATLIC_980
PWY-1881	formate oxidation to CO2		ATLIC_3210,ATLIC_3700,ATLIC_3741,ATLIC_928
PWY0-1314	fructose degradation		ATLIC_1891
PWY-5738	GDP-6-deoxy-D-talose biosynthesis		ATLIC_465,ATLIC_466,ATLIC_1588,ATLIC_2533,ATLIC_2699
PWY-5659	GDP-mannose biosynthesis		ATLIC_1916,ATLIC_2031
PWY-5122	geranyl diphosphate biosynthesis		ATLIC_1354
PWY-5921	glutaminyl-tRNAgln biosynthesis via transamidation		ATLIC_1970,ATLIC_1971
GLUT-REDOX-PWY	glutathione-glutaredoxin redox reactions		ATLIC_1162,ATLIC_1672,ATLIC_2530,ATLIC_3454,ATLIC_3455
PWY-4261	glycerol degradation I		ATLIC_225,ATLIC_226
PWY0-1561	glycerol-3-phosphate to cytochrome bo oxidase electron transfer		ATLIC_1975,ATLIC_1976
GLYSYN-PWY	glycine biosynthesis I		ATLIC_2913,ATLIC_2125,ATLIC_2127,ATLIC_3302,ATLIC_390,ATLIC_418,ATLIC_555,ATLIC_729
GLYCLEAV-PWY	glycine cleavage		ATLIC_1162,ATLIC_135,ATLIC_2481,ATLIC_3042,ATLIC_3886
GLYCOGENSYNTH-PWY	glycogen biosynthesis I (from ADP-D-Glucose)		ATLIC_1832,ATLIC_2147,ATLIC_1971,ATLIC_1972,ATLIC_2421,ATLIC_882
GLYCOLYSIS	glycolysis I (from glucose 6-phosphate)		ATLIC_1061,ATLIC_1063
ANAGLYCOLYSIS-PWY	glycolysis III (from glucose)		ATLIC_1063,ATLIC_1064
PWY-7806	glyphosate degradation II		ATLIC_2951
PWY-7807	glyphosate degradation III		ATLIC_1135,ATLIC_1136,ATLIC_2150
PWY-7226	guanosine deoxyribonucleotides de novo biosynthesis I		ATLIC_2752,ATLIC_3316,ATLIC_2139
PWY-7221	guanosine ribonucleotides de novo biosynthesis		ATLIC_2106,ATLIC_2107,ATLIC_2139
PWY-5964	guanylyl molybdenum cofactor biosynthesis		ATLIC_2167
P283-PWY	hydrogen oxidation I (aerobic)		ATLIC_3885,ATLIC_3901
PWY-6910	hydroxymethylpyrimidine salvage		ATLIC_257,ATLIC_1589,ATLIC_1590,ATLIC_2106,ATLIC_2139,ATLIC_2318,ATLIC_2319,ATLIC_581,ATLIC_583
PWY-5026	indole-3-acetate biosynthesis V (bacteria and fungi)		ATLIC_834,ATLIC_2139
PWY-6123	inosine-5'-phosphate biosynthesis I		ATLIC_2394,ATLIC_2395,ATLIC_581,ATLIC_582,ATLIC_583,ATLIC_584,ATLIC_585,ATLIC_586,ATLIC_587
KDOSYN-PWY	Kdo transfer to lipid IVA I		ATLIC_1833,ATLIC_408
PWY0-1021	L-alanine biosynthesis III		ATLIC_720,ATLIC_2164
ARGSYNBSUB-PWY	L-arginine biosynthesis II (acetyl cycle)		ATLIC_1302,ATLIC_1303,ATLIC_1605,ATLIC_1606,ATLIC_731,ATLIC_837
ARGDEG-III-PWY	L-arginine degradation IV (arginine decarboxylase/agmatine deiminase pathway)		ATLIC_1313,ATLIC_2138,ATLIC_2781,ATLIC_2782,ATLIC_3200,ATLIC_837
PWY490-4	L-asparagine biosynthesis III (tRNA-dependent)		ATLIC_1318,ATLIC_1970,ATLIC_1399,ATLIC_1400,ATLIC_2124,ATLIC_2164,ATLIC_2397,ATLIC_2802,ATLIC_3303,ATLIC_3304
ASPARTATESYN-PWY	L-aspartate biosynthesis		ATLIC_3493,ATLIC_2124,ATLIC_2164,ATLIC_2397,ATLIC_2802,ATLIC_3303,ATLIC_3304
ASPARTATE-DEG1-PWY	L-aspartate degradation I		ATLIC_3493
PWY-I9	L-cysteine biosynthesis VI (from L-methionine)		ATLIC_1520,ATLIC_1960,ATLIC_1578,ATLIC_1579,ATLIC_1671,ATLIC_2557,ATLIC_2558,ATLIC_2559,ATLIC_2560,ATLIC_2981,ATLIC_907
GLUTSYN-PWY	L-glutamate biosynthesis I		ATLIC_1589,ATLIC_1590,ATLIC_2676,ATLIC_384,ATLIC_668
GLUTSYNIII-PWY	L-glutamate biosynthesis III		ATLIC_1589,ATLIC_1590
PWY0-1305	L-glutamate degradation IX (via 4-aminobutanoate)		ATLIC_3186
GLNSYN-PWY	L-glutamine biosynthesis I		ATLIC_1247
GLUTAMINDEG-PWY	L-glutamine degradation I		ATLIC_1302,ATLIC_1303,ATLIC_1073,ATLIC_1074,ATLIC_2159,ATLIC_2160,ATLIC_2161
GLUTAMINEFUM-PWY	L-glutamine degradation II		ATLIC_1589,ATLIC_1590
HISTSYN-PWY	L-histidine biosynthesis		ATLIC_1378,ATLIC_580,ATLIC_1606,ATLIC_731,ATLIC_837
PWY-5344	L-homocysteine biosynthesis		ATLIC_2586,ATLIC_421,ATLIC_690,ATLIC_693
HOMOSERSYN-PWY	L-homoserine biosynthesis		ATLIC_1254,ATLIC_2124,ATLIC_1705,ATLIC_3529
ILEUSYN-PWY	L-isoleucine biosynthesis I (from threonine)		ATLIC_1581,ATLIC_1604
LEUSYN-PWY	L-leucine biosynthesis		ATLIC_1367,ATLIC_2165
DAPLYSINESYN-PWY	L-lysine biosynthesis I		ATLIC_1224,ATLIC_1398
PWY-5097	L-lysine biosynthesis VI		ATLIC_1224,ATLIC_1400
HSERMETANA-PWY	L-methionine biosynthesis III		ATLIC_2582,ATLIC_2586,ATLIC_1137,ATLIC_1138,ATLIC_1140,ATLIC_1141,ATLIC_122
PWY-7527	L-methionine salvage cycle III		ATLIC_1374,ATLIC_1520,ATLIC_1689,ATLIC_1967,ATLIC_2169,ATLIC_2843,ATLIC_720,ATLIC_742
PROSYN-PWY	L-proline biosynthesis I		ATLIC_2105,ATLIC_2575
PROUT-PWY	L-proline degradation		ATLIC_2580
HOMOSER-THRESYN-PWY	L-threonine biosynthesis		ATLIC_1255,ATLIC_3179,ATLIC_203,ATLIC_246,ATLIC_2565
TRPSYN-PWY	L-tryptophan biosynthesis		ATLIC_1069,ATLIC_1072
TYRSYN	L-tyrosine biosynthesis I		ATLIC_1377,ATLIC_1380
VALSYN-PWY	L-valine biosynthesis		ATLIC_1604,ATLIC_1605,ATLIC_1880,ATLIC_1881,ATLIC_2029,ATLIC_2030,ATLIC_2547,ATLIC_2548,ATLIC_491,ATLIC_492,ATLIC_540,ATLIC_541,ATLIC_542,ATLIC_543,ATLIC_544,ATLIC_545,ATLIC_546,ATLIC_547,ATLIC_548,ATLIC_549,ATLIC_550,ATLIC_551,ATLIC_552,ATLIC_634,ATLIC_635,ATLIC_636,ATLIC_637
NAGLIPASYN-PWY	lipid IVA biosynthesis		ATLIC_1362,ATLIC_1538,ATLIC_1977,ATLIC_1978,ATLIC_2787,ATLIC_2788,ATLIC_2789,ATLIC_2790,ATLIC_540,ATLIC_541,ATLIC_542,ATLIC_543,ATLIC_544,ATLIC_545,ATLIC_546,ATLIC_547,ATLIC_548,ATLIC_549,ATLIC_550,ATLIC_551,ATLIC_552,ATLIC_634,ATLIC_635,ATLIC_636,ATLIC_637,ATLIC_638,ATLIC_639
PWY0-501	lipoate biosynthesis and incorporation I		ATLIC_122,ATLIC_1704
PWY0-1275	lipoate biosynthesis and incorporation II		ATLIC_1705,ATLIC_3529
PWY0-522	lipoate salvage I		ATLIC_3529,ATLIC_1590,ATLIC_1840,ATLIC_2139,ATLIC_2566,ATLIC_2568,ATLIC_2569,ATLIC_2570,ATLIC_3493,ATLIC_567
PWY-5143	long-chain fatty acid activation		ATLIC_1239,ATLIC_423,ATLIC_1917,ATLIC_1918,ATLIC_1919,ATLIC_2123,ATLIC_2605,ATLIC_2785,ATLIC_2786,ATLIC_3393,ATLIC_3394
PWY-5386	methylglyoxal degradation I		ATLIC_2128,ATLIC_2133,ATLIC_1917,ATLIC_2123,ATLIC_2785,ATLIC_2786
PWY0-1533	methylphosphonate degradation I		ATLIC_1135,ATLIC_1136,ATLIC_2605,ATLIC_3393,ATLIC_3394
PWY-6823	molybdenum cofactor biosynthesis		ATLIC_140,ATLIC_1684,ATLIC_431,ATLIC_432,ATLIC_433,ATLIC_435,ATLIC_436,ATLIC_437,ATLIC_438,ATLIC_588
PWY-7801	N-end rule pathway I (prokaryotic)		ATLIC_398,ATLIC_564
PWY0-1587	N6-L-threonylcarbamoyladenosine37-modified tRNA biosynthesis		ATLIC_2532
NADPHOS-DEPHOS-PWY	NAD phosphorylation and dephosphorylation		ATLIC_3436,ATLIC_672,ATLIC_202,ATLIC_2311,ATLIC_2720,ATLIC_306,ATLIC_3295,ATLIC_700,ATLIC_95
PWY-5783	octaprenyl diphosphate biosynthesis		ATLIC_1615,ATLIC_202,ATLIC_2311,ATLIC_2720,ATLIC_306,ATLIC_3295,ATLIC_700,ATLIC_95
PWY-6502	oxidized GTP and dGTP detoxification		ATLIC_417,ATLIC_955
PWY-5913	partial TCA cycle (obligate autotrophs)		ATLIC_156,ATLIC_1589,ATLIC_707,ATLIC_885,ATLIC_928
PEPTIDOGLYCANSYN-PWY	peptidoglycan biosynthesis I (meso-diaminopimelate containing)		ATLIC_2613,ATLIC_430,ATLIC_3230,ATLIC_3231
P641-PWY	phenylmercury acetate degradation		ATLIC_1001,ATLIC_1924,ATLIC_1977,ATLIC_2580,ATLIC_2787,ATLIC_2788,ATLIC_2789
PWY-5669	phosphatidylethanolamine biosynthesis I		ATLIC_1607,ATLIC_1608
PWY4FS-7	phosphatidylglycerol biosynthesis I (plastidic)		ATLIC_1030,ATLIC_1586,ATLIC_2481,ATLIC_3042,ATLIC_3886
PWY4FS-8	phosphatidylglycerol biosynthesis II (non-plastidic)		ATLIC_1030,ATLIC_1586
PANTO-PWY	phosphopantothenate biosynthesis I		ATLIC_671,ATLIC_954,ATLIC_928
PPGPPMET-PWY	ppGpp biosynthesis		ATLIC_2704,ATLIC_3698,ATLIC_2752,ATLIC_3316,ATLIC_3536,ATLIC_654,ATLIC_655,ATLIC_804,ATLIC_805,ATLIC_87,ATLIC_872,ATLIC_928,ATLIC_979,ATLIC_980
PWY-6703	preQ0 biosynthesis		ATLIC_1352,ATLIC_2101
PWY0-1544	proline to cytochrome bo oxidase electron transfer		ATLIC_1975,ATLIC_1976
PWY0-662	PRPP biosynthesis I		ATLIC_2267,ATLIC_2540,ATLIC_2541,ATLIC_2545,ATLIC_562,ATLIC_563,ATLIC_564
PWY-43	putrescine biosynthesis II		ATLIC_1313,ATLIC_2138,ATLIC_2538
PWY-7181	pyrimidine deoxyribonucleosides degradation		ATLIC_2144,ATLIC_2146,ATLIC_864
PWY-7197	pyrimidine deoxyribonucleotide phosphorylation		ATLIC_1382,ATLIC_87,ATLIC_1067,ATLIC_1153,ATLIC_1517,ATLIC_1525,ATLIC_1816,ATLIC_1888,ATLIC_1889,ATLIC_1915,ATLIC_1917,ATLIC_2123,ATLIC_2316,ATLIC_2785,ATLIC_2786,ATLIC_3188,ATLIC_820,ATLIC_821
PWY-6545	pyrimidine deoxyribonucleotides de novo biosynthesis III		ATLIC_1592,ATLIC_1663
PWY-7183	pyrimidine nucleobases salvage I		ATLIC_571,ATLIC_2981,ATLIC_907
PWY0-1295	pyrimidine ribonucleosides degradation		ATLIC_2144,ATLIC_2146,ATLIC_2481,ATLIC_2981,ATLIC_3886,ATLIC_907
PYRUVDEHYD-PWY	pyruvate decarboxylation to acetyl CoA		ATLIC_1162,ATLIC_2539,ATLIC_1916,ATLIC_1920,ATLIC_2031,ATLIC_2612
PWY-5485	pyruvate fermentation to acetate IV		ATLIC_1892,ATLIC_2537,ATLIC_2875
PWY-6700	queuosine biosynthesis		ATLIC_2735,ATLIC_863,ATLIC_2621,ATLIC_2622,ATLIC_2875
PWY-5723	Rubisco shunt		ATLIC_1062,ATLIC_1065,ATLIC_490,ATLIC_533
SAM-PWY	S-adenosyl-L-methionine biosynthesis		ATLIC_1520
BSUBPOLYAMSYN-PWY	spermidine biosynthesis I		ATLIC_1578,ATLIC_1579
PWY-6834	spermidine biosynthesis III		ATLIC_1578,ATLIC_1579,ATLIC_1588,ATLIC_2271,ATLIC_2533,ATLIC_255,ATLIC_2571,ATLIC_2699,ATLIC_3234,ATLIC_3235,ATLIC_3236
PWY-621	sucrose degradation III (sucrose invertase)		ATLIC_1371,ATLIC_1372,ATLIC_1538,ATLIC_1833,ATLIC_2317,ATLIC_245,ATLIC_408,ATLIC_421,ATLIC_597,ATLIC_598,ATLIC_690,ATLIC_693
KDO-NAGLIPASYN-PWY	superpathway of (Kdo)2-lipid A biosynthesis		ATLIC_1362,ATLIC_1537,ATLIC_2155,ATLIC_2393,ATLIC_2531,ATLIC_3392,ATLIC_3494
PWY-6277	superpathway of 5-aminoimidazole ribonucleotide biosynthesis		ATLIC_1148,ATLIC_1149,ATLIC_1892,ATLIC_2537,ATLIC_2538
ACETATEUTIL-PWY	superpathway of acetate utilization and formation		ATLIC_1347,ATLIC_1348,ATLIC_1886,ATLIC_2012,ATLIC_2013,ATLIC_2014,ATLIC_2015,ATLIC_2016,ATLIC_2017,ATLIC_2018,ATLIC_2019,ATLIC_2395,ATLIC_2752,ATLIC_3316,ATLIC_343,ATLIC_3536,ATLIC_654,ATLIC_655,ATLIC_804,ATLIC_805,ATLIC_928,ATLIC_979,ATLIC_980
PWY-7229	superpathway of adenosine nucleotides de novo biosynthesis I		ATLIC_150,ATLIC_1655,ATLIC_1604,ATLIC_1605,ATLIC_1606,ATLIC_2165,ATLIC_2781,ATLIC_2782,ATLIC_3200,ATLIC_731,ATLIC_837
BRANCHED-CHAIN-AA-SYN-PWY	superpathway of branched chain amino acid biosynthesis		ATLIC_1367,ATLIC_1581,ATLIC_2277,ATLIC_2777,ATLIC_671,ATLIC_954,ATLIC_955
PANTOSYN-PWY	superpathway of coenzyme A biosynthesis I (bacteria)		ATLIC_1547,ATLIC_1664,ATLIC_2752,ATLIC_3316,ATLIC_3536,ATLIC_3700,ATLIC_3741,ATLIC_654,ATLIC_655,ATLIC_804,ATLIC_805,ATLIC_928,ATLIC_979,ATLIC_980
PWY-7228	superpathway of guanosine nucleotides de novo biosynthesis I		ATLIC_2106,ATLIC_2107,ATLIC_1581,ATLIC_1604,ATLIC_1605,ATLIC_1606,ATLIC_2124,ATLIC_2164,ATLIC_3179,ATLIC_3493,ATLIC_731,ATLIC_837
PWY-3001	superpathway of L-isoleucine biosynthesis I		ATLIC_1254,ATLIC_1255,ATLIC_2164,ATLIC_2582,ATLIC_2586,ATLIC_2619,ATLIC_2620,ATLIC_2621,ATLIC_2622,ATLIC_2875,ATLIC_3493
PWY-5345	superpathway of L-methionine biosynthesis (by sulfhydrylation)		ATLIC_1254,ATLIC_2124,ATLIC_2913
SER-GLYSYN-PWY	superpathway of L-serine and glycine biosynthesis I		ATLIC_1376,ATLIC_1674,ATLIC_2124,ATLIC_2164,ATLIC_3179,ATLIC_3493
THRESYN-PWY	superpathway of L-threonine biosynthesis		ATLIC_1254,ATLIC_1255,ATLIC_2319,ATLIC_571,ATLIC_703,ATLIC_928
PWY-7208	superpathway of pyrimidine nucleobases salvage		ATLIC_1382,ATLIC_2318,ATLIC_1382,ATLIC_1386,ATLIC_1387,ATLIC_2318,ATLIC_2319,ATLIC_2534,ATLIC_572,ATLIC_573,ATLIC_703,ATLIC_928,ATLIC_944
PWY0-162	superpathway of pyrimidine ribonucleotides de novo biosynthesis		ATLIC_1302,ATLIC_1303,ATLIC_2603,ATLIC_2619,ATLIC_2620,ATLIC_2621,ATLIC_2622,ATLIC_2875,ATLIC_722
UBISYN-PWY	superpathway of ubiquinol-8 biosynthesis (prokaryotic)		ATLIC_1403,ATLIC_1615,ATLIC_2185,ATLIC_2186,ATLIC_2583,ATLIC_3020
PWY-7328	superpathway of UDP-glucose-derived O-antigen building blocks biosynthesis		ATLIC_104,ATLIC_1344,ATLIC_1446,ATLIC_2147,ATLIC_2233,ATLIC_3213,ATLIC_677,ATLIC_682
PWY-6614	tetrahydrofolate biosynthesis		ATLIC_2157,ATLIC_651
PWY-6613	tetrahydrofolate salvage from 5,10-methenyltetrahydrofolate		ATLIC_1149,ATLIC_162,ATLIC_3392,ATLIC_3494
PWY-6894	thiamine diphosphate biosynthesis I (E. coli)		ATLIC_256,ATLIC_307,ATLIC_2571,ATLIC_3234,ATLIC_3235,ATLIC_3236
PWY-6893	thiamine diphosphate biosynthesis II (Bacillus)		ATLIC_256,ATLIC_307
PWY-6897	thiamine salvage II		ATLIC_256,ATLIC_257
THIOREDOX-PWY	thioredoxin pathway		ATLIC_2879
PWY-6430	thymine degradation		ATLIC_2138,ATLIC_2141,ATLIC_307
TRNA-CHARGING-PWY	tRNA charging		ATLIC_1217,ATLIC_1259
PWY0-1479	tRNA processing		ATLIC_1260,ATLIC_177
PWY-6708	ubiquinol-8 biosynthesis (prokaryotic)		ATLIC_1403,ATLIC_2185,ATLIC_1276,ATLIC_1332,ATLIC_1565,ATLIC_205,ATLIC_2098,ATLIC_2571,ATLIC_2778,ATLIC_2886,ATLIC_2978,ATLIC_304,ATLIC_3291,ATLIC_3292,ATLIC_3293,ATLIC_3383,ATLIC_627,ATLIC_628,ATLIC_632,ATLIC_665,ATLIC_826,ATLIC_932
PWY-7344	UDP-alpha-D-galactose biosynthesis		ATLIC_1446,ATLIC_3213,ATLIC_240
PWY-4861	UDP-alpha-D-galacturonate biosynthesis I (from UDP-D-glucuronate)		ATLIC_1344,ATLIC_2583,ATLIC_3020
PWY-7343	UDP-alpha-D-glucose biosynthesis I		ATLIC_2147,ATLIC_2233
PWY-7346	UDP-alpha-D-glucuronate biosynthesis (from UDP-glucose)		ATLIC_104
UDPNAGSYN-PWY	UDP-N-acetyl-D-glucosamine biosynthesis I		ATLIC_1916,ATLIC_2020,ATLIC_677,ATLIC_682
PWY-6387	UDP-N-acetylmuramoyl-pentapeptide biosynthesis I (meso-diaminopimelate containing)		ATLIC_2613,ATLIC_430
PWY-5686	UMP biosynthesis I		ATLIC_1302,ATLIC_1303,ATLIC_2021,ATLIC_2031,ATLIC_650
PWY-7176	UTP and CTP de novo biosynthesis		ATLIC_1382,ATLIC_2318,ATLIC_431,ATLIC_433,ATLIC_436,ATLIC_437,ATLIC_438,ATLIC_588
SALVPURINE2-PWY	xanthine and xanthosine salvage		ATLIC_2874,ATLIC_1386,ATLIC_1387,ATLIC_2534,ATLIC_572,ATLIC_573,ATLIC_944
PWY-5358	tetrathionate reduction I (to thiosulfate)		ATLIC_1687,ATLIC_2319,ATLIC_703,ATLIC_928
P222-PWY	sulfide oxidation I (sulfide-quinone reductase)		ATLIC_2095,ATLIC_380
PWY-5285	sulfide oxidation III (persulfide dioxygenase)		ATLIC_1167
SULFUROX-PWY	sulfur oxidation I (aerobic)		ATLIC_1167,ATLIC_2014,ATLIC_2015,ATLIC_2016,ATLIC_2017,ATLIC_2018,ATLIC_2019
RXN-13161	Sulfur dioxygenase SDO		ATLIC_1167
-	HDR complex		ATLIC_3721,ATLIC_3722,ATLIC_3723,ATLIC_3724,ATLIC_1243,ATLIC_1680,ATLIC_1681,ATLIC_1682,ATLIC_1683,ATLIC_2403,ATLIC_3851,ATLIC_3852,ATLIC_3826,ATLIC_3979,ATLIC_3980,ATLIC_3693,ATLIC_3816
1.13.11.55-RXN	Sulfur oxygenase reductase (sor)		ATLIC_2711
PWY-6327	tetrathionate oxidation		ATLIC_519
1.8.5.2-RXN	thiosulfate quinone reductase (DoxDA)		ATLIC_518
PWY-6677	thiosulfate oxidation IV(multienzyme complex)		ATLIC_1695,ATLIC_2938,ATLIC_1697,ATLIC_2942,ATLIC_1693,ATLIC_2944,ATLIC_1692,ATLIC_2939
RXN-11945	sox multienzyme complex		ATLIC_1695,ATLIC_2938,ATLIC_1697,ATLIC_2942,ATLIC_1693,ATLIC_2944,ATLIC_1692,ATLIC_2939,ATLIC_1694,ATLIC_2943

## Sheet: ST3
Supplementary table 3. List of all transcription factor hits in At. thiooxidans Licanantay.
Gene ID	name	Short_description / Specific Aminoacid Locations (if any in UniprotKB)	HTH DOMAINS	SWISSPROT match ID	SWISSPROT description	NR description	NR match ID
ATLIC_1144	ARAR	Transcriptional repressor of the arabinose utilization genes. Also regulates its own expression. Binds to two sequences within the promoters of the araABDLMNPQ-abfA operon and the araE gene, and to one sequence in the araR promoter.	GntR	sp|O86029.3|Y6150_RHIME	DNA-binding transcriptional regulator GntR family	phosphonate operon transcriptional regulator GntR family	ACI62929.1
ATLIC_2663	ARGR	Induces the transcription of the PA5384-PA5388 operon in response to carnitine	HTH_18, HTH_AraC	sp|Q9HTH5.1|CDHR_PSEAE	Transcriptional regulator GlxA family contains an amidase domain and an AraC-type DNA-binding HTH domain	AraC family transcriptional regulator	WP_031569282.1
ATLIC_3021	ARSR	Binds arsenite and regulates the expression of arsenic efflux pumps. In vitro, also binds antimony and bismuth, but not arsenate.	HTH_5, HTH_20	sp|P28267.1|NOLR_RHIML	DNA-binding transcriptional regulator ArsR family	ArsR family transcriptional regulator	WP_024893036.1
ATLIC_2722	ATOC	Member of the two-component regulatory system AtoS/AtoC. In the presence of acetoacetate, AtoS/AtoC stimulates the expression of the atoDAEB operon, leading to short chain fatty acid catabolism and activation of the poly-(R)-3-hydroxybutyrate (cPHB) biosynthetic pathway. Also induces the operon in response to spermidine	HTH_8	sp|Q06065.2|ATOC_ECOLI	DNA-binding transcriptional response regulator NtrC family contains REC AAA-type ATPase and a Fis-type DNA-binding domains	Fis family transcriptional regulator	WP_031569171.1
ATLIC_3395	BIGR	Represses an operon that comprises at least itself and blh. Binds to a palindromic AT-rich sequence spanning the -10 region of the blh promoter and blocks transcription of the operon.	HTH_5,HTH_20	sp|Q8UAA8.3|BIGR_AGRT5	DNA-binding transcriptional regulator ArsR family	ArsR family transcriptional regulator	WP_010637953.1
ATLIC_3255	CADC	(13-C,16-C,51-C,55-C,103-C,105-C,142-C) - the 13-C, 16-C, 51-C, 55-C correlated with metal binding Cadmium dimeric partner. Metal-binding repressor for the cad operon. Involved in resistance to heavy metals, such as cadmium, bismuth, zinc or lead. Metal binding causes the repressor to dissociate from the DNA	HTH_5, HTH_20	sp|P30339.2|CADC_BACPE	DNA-binding transcriptional regulator ArsR family	ArsR family transcriptional regulator partial	WP_035211511.1
ATLIC_1242	CARH	Negative regulator of genes involved in carotenoid biosynthesis.	MerR_1, MerR	sp|Q53W62.1|CARH_THET8	Methanogenic corrinoid protein MtbC1	MerR family transcriptional regulator	WP_031571316.1
ATLIC_996	CMPR	Activates transcription of the cmpABCD operon under carbon dioxide-limited conditions. Specifically binds to the cmpR-cmpA intergenic region.	HTH_1	sp|Q55459.1|CMPR_SYNY3	DNA-binding transcriptional regulator LysR family
ATLIC_1007	CMPR	Activates transcription of the cmpABCD operon under carbon dioxide-limited conditions. Specifically binds to the cmpR-cmpA intergenic region.	HTH_1	sp|Q55459.1|CMPR_SYNY3	DNA-binding transcriptional regulator LysR family	LysR family transcriptional regulator	WP_031571456.1
ATLIC_1562	CMPR	Activates transcription of the cmpABCD operon under carbon dioxide-limited conditions. Specifically binds to the cmpR-cmpA intergenic region.	HTH_1	sp|Q55459.1|CMPR_SYNY3	DNA-binding transcriptional regulator LysR family	LysR family transcriptional regulator	WP_024893412.1
ATLIC_2035	CMPR	Activates transcription of the cmpABCD operon under carbon dioxide-limited conditions. Specifically binds to the cmpR-cmpA intergenic region.	HTH_1	sp|Q55459.1|CMPR_SYNY3	DNA-binding transcriptional regulator LysR family	LysR family transcriptional regulator	WP_024893094.1
ATLIC_2173	CMPR	Activates transcription of the cmpABCD operon under carbon dioxide-limited conditions. Specifically binds to the cmpR-cmpA intergenic region.	HTH_1	sp|Q55459.1|CMPR_SYNY3	DNA-binding transcriptional regulator LysR family	LysR family transcriptional regulator	WP_031570330.1
ATLIC_2846	CMPR	Activates transcription of the cmpABCD operon under carbon dioxide-limited conditions. Specifically binds to the cmpR-cmpA intergenic region.	HTH_1	sp|Q55459.1|CMPR_SYNY3	DNA-binding transcriptional regulator LysR family	LysR family transcriptional regulator	WP_031573033.1
ATLIC_1679	CUER	Position: 116-C, 125-C, closely position with CUER	MerR-DNA-bind, MerR_1, MerR	sp|P0A9G4|CUER_ECOLI	HTH-type transcriptional regulator CueR	MerR family transcriptional regulator	WP_010641489.1
ATLIC_1930	CUER	(113-C,121-C, 131 Amionacids)	MerR-DNA-bind, MerR_1, MerR	sp|P0ACS6.1|ZNTR_ECO57	DNA-binding transcriptional regulator MerR family	hypothetical protein	WP_031572187.1
ATLIC_2072	CuSR2	CusR, Cu-sensing regulator , regulates genes related to the copper and silver efflux systems	Trans_reg_C	sp|P52076.1|QSEB_ECOLI	DNA-binding response regulator OmpR family contains REC and winged-helix (wHTH) domain	XRE family transcriptional regulator	WP_031574181.1
ATLIC_1461	CYNR	Activates transcription of the aaeXAB operon	HTH_1	sp|P67663.1|AAER_ECOL6	DNA-binding transcriptional regulator LysR family	LysR family transcriptional regulator	WP_024893071.1
ATLIC_2625	CYSB	This protein is a positive regulator of gene expression for the cysteine regulon, a system of 10 or more loci involved in the biosynthesis of L-cysteine	HTH_1	sp|P06614.1|CYSB_SALTY	DNA-binding transcriptional regulator LysR family	CysB family transcriptional regulator	WP_031571440.1
ATLIC_2081	CZCR	Member of the two-component regulatory system CzcS/CzcR involved in the control of cobalt, zinc and cadmium homeostasis.	Trans_reg_C	sp|Q44006.1|CZCR_RALME	DNA-binding response regulator OmpR family contains REC and winged-helix (wHTH) domain	transcriptional regulator	WP_031574199.1
ATLIC_1272	DHAR	Transcriptional repressor for the dhaA haloalkane dehalogenase gene.	TetR_N	sp|Q9RAJ1.1|DHAR_MYCSX	DNA-binding transcriptional regulator AcrR family	TetR family transcriptional regulator	WP_024894425.1
ATLIC_260	DNAA	Chromosomal replication initiation ATPase DnaA	Bac_DnaA_C	sp|A1WWE0.1|DNAA_HALHL	Chromosomal replication initiation ATPase DnaA	chromosomal replication initiator protein DnaA	WP_031572683.1
ATLIC_449	FISL	transcriptional regulatory Fis family	HTH_8	sp|Q8Y231.1|FISL_RALSO	DNA-binding protein Fis (factor for inversion stimulation)	Fis family transcriptional regulator	WP_010641203.1
ATLIC_191	FIXK	FixK is a protein that regulates nitrogen fixation genes both positively and negatively. FixK appears to repress its own expression and that of nifA. FixK may bind DNA at the FNR consensus binding site.	HTH_Crp_2, Crp, MarR_2	P13295	Nitrogen fixation regulation protein FixK	Crp/Fnr family transcriptional regulator	WP_024893711.1
ATLIC_3607	FIXK	B.japonicum has two FixLJ-dependent FixK homologs that are activators of the transcription of a group of genes involved in anaerobic processes such as denitrification and possibly nitrogen fixation	HTH_Crp_2, Crp	sp|P29286.1|FIXK_BRADU	cAMP-binding domain of CRP or a regulatory subunit of cAMP-dependent protein kinases	Crp/Fnr family transcriptional regulator	WP_031574153.1
ATLIC_330	FLIA			sp|P0AEM8.1|FLIA_ECO57	DNA-directed RNA polymerase specialized sigma subunit	RNA polymerase sigma factor	WP_035209670.1
ATLIC_1883	FNR	(11-C,14-C,31-C,70-C,112-C) Global transcription factor that controls the expression of over 100 target genes in response to anoxia.	HTH_Crp_2, Crp	sp|P0C6D0.1|FNR_VIBCH	cAMP-binding domain of CRP or a regulatory subunit of cAMP-dependent protein kinases	Crp/Fnr family transcriptional regulator	WP_010638875.1
ATLIC_2551	FNRA	(13-C,16-C,117-C,164-C,173-C) Transcriptional regulator of arginine deiminase, Possesses 4 cysteines which may bind a metal ion (possibly iron)	HTH_Crp_2, Crp	sp|P47200.1|FNRA_PSEST	cAMP-binding domain of CRP or a regulatory subunit of cAMP-dependent protein kinases	hypothetical protein	WP_029316088.1
ATLIC_2574	FUR	( 95-C,98-C,135-C,144-C) Only Iron binding Cysteins, Acts as a global negative controlling element, employing Fe2+ as a cofactor to bind the operator of the repressed genes.	FUR	sp|P0A9B1.1|FUR_ECO57	Fe2+ or Zn2+ uptake regulation protein	Fur family transcriptional regulator	WP_010641352.1
ATLIC_675	GLRR	Member of the two-component regulatory system GlrR/GlrK that up-regulates transcription of the glmY sRNA when cells enter the stationary growth phase. such as RcsB/RcsC and PhoP/PhoQ.	HTH_8	sp|P0AFU5.1|QSEF_ECO57	DNA-binding transcriptional response regulator NtrC family contains REC AAA-type ATPase and a Fis-type DNA-binding domains
ATLIC_2425	GLTC	Positive regulator of glutamate biosynthesis (gltAB genes). Negatively regulates its own expression.	HTH_1	sp|P20668.3|GLTC_BACSU	DNA-binding transcriptional regulator LysR family	LysR family transcriptional regulator	WP_031569342.1
ATLIC_1196	HIGA2	Antitoxin component of a type II toxin-antitoxin (TA) system that counteracts the effect of the HigB-2 toxin. Binds to its own promoter and regulates transcription of the higB-2/higA-2 operon.	HTH_3, MqsA_antitoxin, HTH_31	sp|Q9KMA5.1|HIGA2_VIBCH	DNA-binding transcriptional regulator YiaG XRE-type HTH domain	transcriptional regulator	WP_031574713.1
ATLIC_3104	HIGA2	Antitoxin component of a type II toxin-antitoxin (TA) system that counteracts the effect of the HigB-2 toxin. Binds to its own promoter and regulates transcription of the higB-2/higA-2 operon	HTH_31	N\A	DNA-binding transcriptional regulator YiaG XRE-type HTH domain	DNA-binding protein	WP_010638017.1
ATLIC_626	IHFA	A specific DNA-binding protein that functions in genetic recombination as well as in transcriptional and translational control. Binds to hundreds of transcriptionally inactive, AT-rich DNA sites, approximately half its binding sites are in non-coding DNA, which only accounts for about 10% of the genome	Bac_DNA_binding	sp|Q63TM8.1|IHFA_BURPS	Bacterial nucleoid DNA-binding protein	integration host factor subunit alpha	WP_024893611.1
ATLIC_1846	IHFA	A specific DNA-binding protein that functions in genetic recombination as well as in transcriptional and translational control. Binds to hundreds of transcriptionally inactive, AT-rich DNA sites, approximately half its binding sites are in non-coding DNA, which only accounts for about 10% of the genome	Bac_DNA_binding	sp|Q7NYC0.1|IHFA_CHRVO	Bacterial nucleoid DNA-binding protein	integration host factor subunit alpha	WP_031571961.1
ATLIC_2388	IHFA	A specific DNA-binding protein that functions in genetic recombination as well as in transcriptional and translational control. Binds to hundreds of transcriptionally inactive, AT-rich DNA sites, approximately half its binding sites are in non-coding DNA, which only accounts for about 10% of the genome	Bac_DNA_binding	sp|Q31F20.1|IHFA_THICR	Bacterial nucleoid DNA-binding protein	integration host factor subunit alpha	WP_031573521.1
ATLIC_3262	IHFA	A specific DNA-binding protein that functions in genetic recombination as well as in transcriptional and translational control. Binds to hundreds of transcriptionally inactive, AT-rich DNA sites, approximately half its binding sites are in non-coding DNA, which only accounts for about 10% of the genome	Bac_DNA_binding	sp|A5EXT4.1|IHFA_DICNV	Bacterial nucleoid DNA-binding protein	integration host factor subunit alpha	WP_031576128.1
ATLIC_1093	IHFB	This protein is one of the two subunits of integration host factor, a specific DNA-binding protein that functions in genetic recombination as well as in transcriptional and translational control	Bac_DNA_binding	sp|Q21IT4.1|IHFB_SACD2	Bacterial nucleoid DNA-binding protein	hypothetical protein	WP_031572032.1
ATLIC_1384	IHFB	This protein is one of the two subunits of integration host factor, a specific DNA-binding protein that functions in genetic recombination as well as in transcriptional and translational control	Bac_DNA_binding	sp|Q8Y0Y3.1|IHFB_RALSO	Bacterial nucleoid DNA-binding protein	integration host factor subunit beta	WP_010638105.1
ATLIC_3055	IHFB	This protein is one of the two subunits of integration host factor, a specific DNA-binding protein that functions in genetic recombination as well as in transcriptional and translational control	Bac_DNA_binding	sp|A1B8K9.1|IHFB_PARDP	Bacterial nucleoid DNA-binding protein	hypothetical protein	WP_031570796.1
ATLIC_3377	IHFB	This protein is one of the two subunits of integration host factor, a specific DNA-binding protein that functions in genetic recombination as well as in transcriptional and translational control	Bac_DNA_binding	sp|Q21IT4.1|IHFB_SACD2	Bacterial nucleoid DNA-binding protein	hypothetical protein	WP_031572032.1
ATLIC_3773	IHFB	This protein is one of the two subunits of integration host factor, a specific DNA-binding protein that functions in genetic recombination as well as in transcriptional and translational control	Bac_DNA_binding	sp|Q21IT4.1|IHFB_SACD2	Bacterial nucleoid DNA-binding protein	hypothetical protein	WP_031574628.1
ATLIC_721	ISCR	Cysteine:(31-C,91-C,98-C,99-C,106-C), 91-C,98-C,99-C in agreement with iscR. A regulator of the hmc operon which encodes iron-sulfur-containing proteins as well as other proteins involved in electron transport, Other rrf2-type HTH proteins are regulators of genes involved in nitrite or iron metabolism, or nitric oxide detoxification.	Rrf2	Q6LU63|ISCR_PHOPR	DNA-binding transcriptional regulator IscR family
ATLIC_2683	KDPE	Member of the two-component regulatory system KdpD/KdpE involved in the regulation of the kdp operon	Trans_reg_C	sp|P21866.3|KDPE_ECOLI	DNA-binding response regulator OmpR family contains REC and winged-helix (wHTH) domain	transcriptional regulator	WP_031574313.1
ATLIC_169	LEXA	Represses a number of genes involved in the response to DNA damage (SOS response)	LexA_DNA_bind	sp|B5EJ91.1|LEXA_ACIF5	SOS-response transcriptional repressor LexA (RecA-mediated autopeptidase)	LexA repressor	WP_031572365.1
ATLIC_1368	LRP	Positive regulator of the bkd operon for branched-chain keto acid dehydrogenase complex.	HTH_24, HTH_AsnC-type	sp|P42179.1|BKDR_PSEPU	DNA-binding transcriptional regulator Lrp family	AsnC family transcriptional regulator	WP_010639082.1
ATLIC_1297	MARR*	The expression of the mar operon is controlled by a repressor, MarR. A large number of compounds induce transcription of the mar operon. This is thought to be due to the compound binding to MarR, and the resulting complex stops MarR binding to the DNA. With the MarR repression lost, transcription of the operon proceeds	HTH_11, MarR_2, HTH_20	N\A	Predicted transcriptional regulator	transcriptional regulator	WP_031575356.1
ATLIC_1922	MERR	(85-C,120-C,135-C Possible MerR) Mediates the mercuric-dependent induction of mercury resistance operon. In the absence of mercury MerR represses transcription by binding tightly to the mer operator region; when mercury is present the dimeric complex binds a single ion and becomes a potent transcriptional activator, while remaining bound to the mer site.	MerR_1, MerR-DNA-bind, MerR	sp|P13111.1|MERR_SERMA	DNA-binding transcriptional regulator MerR family	MerR family transcriptional regulator	WP_031572178.1
ATLIC_3565	MERR	Metal-Binding Cysteine residues:81-C,116-C,125-C. Mediates the mercuric-dependent induction of mercury resistance operon. In the absence of mercury MerR represses transcription by binding tightly to the mer operator region; when mercury is present the dimeric complex binds a single ion and becomes a potent transcriptional activator, while remaining bound to the mer site	MerR-DNA-bind, MerR	sp|P0A2Q8.1|MERR_SALTI	DNA-binding transcriptional regulator MerR family	MerR family transcriptional regulator	WP_031573789.1
ATLIC_1038	METR	Control of the last step in methionine biosynthesis; MetR is a positive activator of the metA, metE and metH genes	HTH_1	sp|P45349.1|METR_HAEIN	DNA-binding transcriptional regulator LysR family	LysR family transcriptional regulator	WP_031571521.1
ATLIC_1582	MODE	The ModE-Mo complex acts as a repressor of the modABC operon, involved in the transport of molybdate. Upon binding molybdate, the conformation of the protein changes, promoting dimerization of ModE-Mo. The protein dimer is then competent to bind a DNA region, upstream of the modABC operon, which contains an 8-base inverted repeat 5'-TAACGTTA-3' flanked by two CAT boxes. Acts also as an enhancer o…	HTH_1	sp|P37733.1|MODE_AZOVI	DNA-binding transcriptional regulator ModE (molybdenum-dependent)	LysR family transcriptional regulator	WP_031574488.1
ATLIC_3199	NIFA	Required for activation of most nif operons, which are directly involved in nitrogen fixation.	HTH_23	sp|P03027.1|NIFA_KLEPN	Transcriptional regulator containing PAS AAA-type ATPase and DNA-binding Fis domains	Fis family transcriptional regulator	WP_035211472.1
ATLIC_3801	NMTR	Putative Nickel metal-Binding:(6-D,38-D,78-D,87-D,93-D,103-D). Represses transcription of ctpJ/nmtA, by binding to its promoter region.	HTH_20, HTH_21	sp|O69711.3|NMTR_MYCTU	DNA-binding transcriptional regulator ArsR family	ArsR family transcriptional regulator partial	WP_031576217.1
ATLIC_1617	NTRC	Member of the two-component regulatory system NtrB/NtrC, which controls expression of the nitrogen-regulated (ntr) genes in response to nitrogen limitation. Phosphorylated NtrC binds directly to DNA and stimulates the formation of open promoter-sigma54-RNA polymerase complexes.	HTH_8	sp|P0AFB9.1|NTRC_ECO57	DNA-binding transcriptional response regulator NtrC family contains REC AAA-type ATPase and a Fis-type DNA-binding domains	nitrogen regulation protein NR(I)	WP_010639301.1
ATLIC_279	NTRX	Factor for Inversion Stimulation (FIS)	HTH_8	sp|Q04849.1|NTRX_AZOC5	DNA-binding transcriptional response regulator NtrC family contains REC AAA-type ATPase and a Fis-type DNA-binding domains	two component sigma-54 specific Fis family transcriptional regulator	WP_010640895.1
ATLIC_1018	OMPR	The N-terminus of this protein is required for the transcriptional expression of both major outer membrane protein genes ompF and ompC; its C-terminal moiety mediates the multimerization of the OmpR protein. As a multimer, it turns on the expression of the ompC gene; as a monomer, it turns on the expression of the ompF gene.	Trans_reg_C	sp|P0AA16.1|OMPR_ECOLI	DNA-binding response regulator OmpR family contains REC and winged-helix (wHTH) domain	chemotaxis protein CheY	WP_031571480.1
ATLIC_1047	OMPR	The N-terminus of this protein is required for the transcriptional expression of both major outer membrane protein genes ompF and ompC; its C-terminal moiety mediates the multimerization of the OmpR protein. As a multimer, it turns on the expression of the ompC gene; as a monomer, it turns on the expression of the ompF gene.	Trans_reg_C	sp|P0AA16.1|OMPR_ECOLI	DNA-binding response regulator OmpR family contains REC and winged-helix (wHTH) domain	osmolarity response regulator	WP_031573823.1
ATLIC_2226	OMPR	The N-terminus of this protein is required for the transcriptional expression of both major outer membrane protein genes ompF and ompC; its C-terminal moiety mediates the multimerization of the OmpR protein. As a multimer, it turns on the expression of the ompC gene; as a monomer, it turns on the expression of the ompF gene.	Trans_reg_C	sp|P0AA16.1|OMPR_ECOLI	DNA-binding response regulator OmpR family contains REC and winged-helix (wHTH) domain	transcriptional regulator partial	WP_031572197.1
ATLIC_2478	PERR	109-C,112-C,117-C,145-C,148-C, Represses the expression of most of the genes involved in oxidative stress response, such as rbr3A-rbr3B, dfx, rd, nror, fprA1 and fprA2, coding for reverse rubrerythrins, desulfoferrodoxin, rubredoxin, NADH-rubredoxin oxidoreductase (NROR), and oxygen-reducing flavoproteins, respectively	FUR	sp|Q97FU2.1|PERR_CLOAB	Fe2+ or Zn2+ uptake regulation protein	Fur family transcriptional regulator	WP_024893737.1
ATLIC_711	PHOB	This protein is a positive regulator for the phosphate regulon	Trans_reg_C	sp|P45605.1|PHOB_KLEPN	DNA-binding response regulator OmpR family contains REC and winged-helix (wHTH) domain
ATLIC_3475	PHOB	This protein is a positive regulator for the phosphate regulon	Trans_reg_C	sp|P45605.1|PHOB_KLEPN	DNA-binding response regulator OmpR family contains REC and winged-helix (wHTH) domain	hypothetical protein	WP_031571229.1
ATLIC_1819	PUUR	This protein regulates the pathway putrescine degradation, which is part of Amine and polyamine degradation.	HTH_31, HTH_3, HTH_19, HTH_26	sp|P0A9U6.1|PUUR_ECOLI	Transcriptional regulator contains XRE-family HTH domain	DNA-binding protein	WP_031571239.1
ATLIC_2136	PUUR	This protein regulates the pathway putrescine degradation, which is part of Amine and polyamine degradation.	HTH_19, HTH_31	sp|P0A9U6.1|PUUR_ECOLI	Predicted transcriptional regulator with C-terminal CBS domains	XRE family transcriptional regulator	WP_035209560.1
ATLIC_822	RBCR	RuBisCO operon transcriptional regulator	HTH_1	sp|Q06610.1|RBCR_ACIFR	DNA-binding transcriptional regulator LysR family
ATLIC_2697	RBCR	Trans-acting transcriptional regulator of RuBisCO genes (rbcL and rbcS) expression	HTH_1	sp|A2CI69.1|RBCR_CHLAT	DNA-binding transcriptional regulator LysR family	LysR family transcriptional regulator	WP_031570132.1
ATLIC_2844	RBCR	Trans-acting transcriptional regulator of RuBisCO genes (rbcL and rbcS) expression	HTH_1	sp|Q4G384.1|RBCR_EMIHU	DNA-binding transcriptional regulator LysR family	LysR family transcriptional regulator	WP_031573026.1
ATLIC_2980	RBCR	Trans-acting transcriptional regulator of RuBisCO genes (rbcL and rbcS) expression	HTH_1	sp|P25544.1|RBCR_ALLVI	DNA-binding transcriptional regulator LysR family	transcriptional regulator	WP_031570013.1
ATLIC_3037	RBCR	Trans-acting transcriptional regulator of RuBisCO genes (rbcL and rbcS) expression	HTH_1	sp|Q85G62.1|RBCR_CYAME	DNA-binding transcriptional regulator LysR family	LysR family transcriptional regulator	WP_010637323.1
ATLIC_170	RPOD			sp|P0A2E3.1|RPOD_SALTY	DNA-directed RNA polymerase sigma subunit (sigma70/sigma32)	RNA polymerase subunit sigma-70	WP_031572366.1
ATLIC_302	RPOE			sp|Q7U1Z6.1|SIGK_MYCBO	DNA-directed RNA polymerase specialized sigma subunit sigma24 family	RNA polymerase subunit sigma-24	WP_024894450.1
ATLIC_2795	RPOH			sp|Q8DD54.1|RPOH_VIBVU	DNA-directed RNA polymerase sigma subunit (sigma70/sigma32)	RNA polymerase factor sigma-32	WP_031569959.1
ATLIC_602	RPON	eased. This sigma factor is responsible for the expression of the nitrogen fixation genes	Sigma54_DBD, Sigma54_CDB	sp|P24695.1|RP54_ACIFR	DNA-directed RNA polymerase specialized sigma subunit sigma54 homolog	RNA polymerase factor sigma-54	WP_031571010.1
ATLIC_175	RPOS			sp|P45684.1|RPOS_PSEAE	DNA-directed RNA polymerase sigma subunit (sigma70/sigma32)	RNA polymerase sigma70 factor	WP_031572370.1
ATLIC_1251	RPOS		Sigma70_r2, Sigma70_r3, Sigma70_r4	sp|P35540.3|RPOS_SHIFL	DNA-directed RNA polymerase sigma subunit (sigma70/sigma32)	RNA polymerase sigma factor RpoS	WP_031571328.1
ATLIC_3407	RPOS			sp|P47765.1|RPOS_YEREN	DNA-directed RNA polymerase sigma subunit (sigma70/sigma32)	hypothetical protein partial	WP_035210721.1
ATLIC_391	RUTR	Master transcription regulator which represses the degradation of pyrimidines (rutABCDEFG) and purines (gcl operon) for maintenance of metabolic balance between pyrimidines and purines. It also regulates the synthesis of pyrimidine nucleotides and arginine from glutamine (carAB) and the supply of glutamate (gadABWX) (By similarity	TetR_N	sp|Q8X4Z7.1|RUTR_ECO57	DNA-binding transcriptional regulator AcrR family	TetR family transcriptional regulator	WP_010641313.1
ATLIC_3267	SIGE			sp|A0R2D4.1|SIGE_MYCS2	DNA-directed RNA polymerase specialized sigma subunit sigma24 family	RNA polymerase sigma-70 factor	WP_035210136.1
ATLIC_2340	SIGG			sp|P45215.1|Y1459_HAEIN	DNA-directed RNA polymerase specialized sigma subunit sigma24 family	RNA polymerase sigma-70 factor	WP_014028228.1
ATLIC_2552	SIGZ			sp|O05409.1|SIGZ_BACSU	DNA-directed RNA polymerase specialized sigma subunit sigma24 family	RNA polymerase sigma70	WP_031570097.1
ATLIC_1307	SLYA	Transcription regulator that can specifically activate or repress expression of target genes	MarR_2, MarR, HTH_27, HTH_Crp_2	sp|Q7VR54.1|SLYA_BLOFL	DNA-binding transcriptional regulator MarR family	MarR family transcriptional regulator	WP_010639535.1
ATLIC_1002	SOXR	(85-C,120-C,131-C,136-C), 4 Metal-Binding cysteine near the position of SoxR of E. coli. Mediates the mercuric-dependent induction of mercury resistance operon. In the absence of mercury MerR represses transcription by binding tightly to the mer operator region; when mercury is present the dimeric complex binds a single ion and becomes a potent transcriptional activator, while remaining bound to …	MerR_1, MerR-DNA-bind, MerR	sp|P0A183.1|MERR_PSEAI	DNA-binding transcriptional regulator MerR family	MerR family transcriptional regulator	WP_024894160.1
ATLIC_1076	Y268	Putative HTH-type transcriptional regulator aq_268	Rrf2	sp|O66625.2|Y268_AQUAE	DNA-binding transcriptional regulator IscR family	Rrf2 family transcriptional regulator	WP_010641086.1
ATLIC_98	Y4MF	Cro/C1-type helix-turn-helix domain	HTH_Crp_2, HTH_31, HTH_3	sp|P55565.1|Y4MF_RHISN	Predicted transcriptional regulator with C-terminal CBS domains	transcriptional regulator	WP_031572319.1
ATLIC_3272	YAFC	Uncharacterized HTH-type transcriptional regulator YafC	HTH_1	sp|P30864.1|YAFC_ECOLI	DNA-binding transcriptional regulator LysR family	LysR family transcriptional regulator	WP_010642423.1
ATLIC_625	YHI4	(36-C,145-C) HTH-type transcriptional regulator in himA 3'region	MerR_1, MerR	sp|P30791.1|YHI4_RHOCA	DNA-binding transcriptional regulator MerR family
ATLIC_2282	YQJI	Phenolic acids regulate PadR repression activity, by impairing it's binding to the padC promoter.	PadR	sp|P64589.1|YQJI_SHIFL	DNA-binding transcriptional regulator PadR family	hypothetical protein	WP_031573337.1
ATLIC_347	ZRAR	Member of the two-component regulatory system ZraS/ZraR. When activated by ZraS it acts in conjunction with sigma-54 to regulate the expression of zraP. Positively autoregulates the expression of the zraSR operon (By similarity)	HTH_8, HTH_28, HTH_23	sp|Q9APD9.1|ZRAR_KLEOX	DNA-binding transcriptional response regulator NtrC family contains REC AAA-type ATPase and a Fis-type DNA-binding domains	Fis family transcriptional regulator	WP_024892698.1
ATLIC_1165	ZRAR	Member of the two-component regulatory system ZraS/ZraR. When activated by ZraS it acts in conjunction with sigma-54 to regulate the expression of zraP. Positively autoregulates the expression of the zraSR operon (By similarity)	HTH_8	sp|Q8Z333.1|ZRAR_SALTI	Transcriptional regulator containing PAS AAA-type ATPase and DNA-binding Fis domains	Fis family transcriptional regulator	WP_010639175.1
ATLIC_1691	ZRAR	Member of the two-component regulatory system ZraS/ZraR. When activated by ZraS it acts in conjunction with sigma-54 to regulate the expression of zraP. Positively autoregulates the expression of the zraSR operon (By similarity)	HTH_8	sp|Q9APD9.1|ZRAR_KLEOX	DNA-binding transcriptional response regulator NtrC family contains REC AAA-type ATPase and a Fis-type DNA-binding domains	Fis family transcriptional regulator	WP_031575930.1
ATLIC_2183	ZRAR	Positively autoregulates the expression of the zraSR operon.	HTH_8	sp|P14375.2|ZRAR_ECOLI	DNA-binding transcriptional response regulator NtrC family contains REC AAA-type ATPase and a Fis-type DNA-binding domains	Fis family transcriptional regulator	WP_031570396.1
ATLIC_2764	ZRAR	Positively autoregulates the expression of the zraSR operon.	HTH_8	sp|P25852.2|ZRAR_SALTY	DNA-binding transcriptional response regulator NtrC family contains REC AAA-type ATPase and a Fis-type DNA-binding domains	Fis family transcriptional regulator	WP_031572455.1

## Sheet: ST4
Supplementary table 4. PSSM motifs for transcription factors identified in At. thiooxidans Licanantay.
Transcription Factor	MOTIF	ORGANISM/ORIGIN	REF	ALTERNATIVE
DHAR	YES	AcoR Bacillales	RegPrecise	ACOR
ARAR	YES	Shewanellaceae	RegPrecise	ARAR
ARGR	YES	Shewanellaceae	RegPrecise	ARGR
ARSR	YES	Desulfovibrionales	RegPrecise	ARSR
ATOC	YES	E. coli	Motif5 Supplementary material of [1]	ATOC
BIGR	YES	Multiple Organisms	Motif Generated from Fig 5 of [2]	BIGR
CUER	YES	Oceanospirillales_Alteromonadales	RegPrecise	CUER
CUSR2	YES	E. coli	RegulonDB	CUSR
CYNR	YES	E. coli	Prodoric	CYNR
CYSB	YES	E. coli	Prodoric	CYSB
CZCR	YES	Lactobacillaceae	RegPrecise	CZCR1
DNAA	YES	E. coli	Prodoric	DNAA
FISL	YES	E.coli	Prodoric	FIS
NTRX	SHARE	FIS FAMILIY	RegPrecise	FIS
FIXK	YES	Caulobacterales	RegPrecise	FIXK
FLIA	YES	Desulfovibrionales	RegPrecise	FLIA
FNR	YES	Shewanella	RegPrecise	FNR
FUR	YES	Enterobacteriales	RegPrecise	FUR
GLTC	YES	Bacillales	RegPrecise	GLTC
IHF	YES	P. aeruginosa	Prodoric	IHF
ISCR	YES	Oceanospirillales_Alteromonadales	RegPrecise	ISCR
LEXA	YES	Oceanospirillales_Alteromonadales	RegPrecise	LEXA
LRP	YES	E. coli	Prodoric	LRP
CMPR	YES	Enterobacteriales (LysR)	RegPrecise	LYSR
RBCR	SUPERFAMILY	LYSR	RegPrecise	LYSR
YAFC	YES	LysR SuperFamily	RegPrecise	LYSR
MARR	YES	Enterobacteriales	RegPrecise	MARR
MERR	YES	Oceanospirillales_Alteromonadales	RegPrecise	MERR
YHI4	YES	MerR SuperFamily	RegPrecise	MERR
METR	YES	Oceanospirillales_Alteromonadales	RegPrecise	METR
MODE	YES	Oceanospirillales_Alteromonadales	RegPrecise	MODE
NIFA	YES	Sphingomonadales	RegPrecise	NIFA
GLRR	SHARE	NTRC	RegPrecise	NTRC
NTRC	YES	Oceanospirillales_Alteromonadales	RegPrecise	NTRC
KDPE	SHARE	OMPR	RegPrecise	OMPR
OMPR	YES	E. coli	Prodoric	OMPR
YQJI	YES	SuperFamiliy PAdR	RegPrecise	PADR
PERR	YES	Desulfovibrionales	RegPrecise	PERR
PHOB	YES	Desulfovibrionales	RegPrecise	PHOB
PUUR	YES	Thermotogales	RegPrecise	PUUR
NMTR	SIMILAR	RncR Enterobacteriaceae	RegPrecise	RNCR
RPOE	YES	E. coli	RegPrecise	RPOE
RPOH	YES	Desulfovibrionales	RegPrecise	RPOH
RPON	YES	Desulfovibrionales	RegPrecise	RPON
RUTR	YES	Oceanospirillales_Alteromonadales	RegPrecise	RUTR
SLYA	YES	E. coli	Prodoric	SLYA
CADC	YES	Desulfovibrionales (ARSR/SMTB)	RegPrecise	SMTB
SOXR	YES	Oceanospirillales_Alteromonadales	RegPrecise	SOXR
ZRAR	YES	Desulfovibrionales	RegPrecise	ZRAR
